# Supplementary material for: Atypical Asymmetrical Perceptual Organization in Attention Deficit Hyperactivity Disorder: An Event-Related Potential Study on Contour Integration
Source: Research Square preprint supplement (doi:10.21203/rs.3.rs-6733173/v1), 2025-06-02
Supplement: Supplementary file 1 [file eb918b72eb274cd1e1fc7e42.docx]

**Supporting Information**

**Appendix S1: Methods**

**Appendix S1a. Participants**

Our study recruited 123 Chinese children and adolescents (80 children with ADHD and 43 HC) aged 6 to 16. All children with ADHD were enrolled in the Peking University Sixth Hospital outpatient clinic, while HC were recruited from local primary and junior high schools. A senior psychiatrist conducted the clinical diagnosis, which was validated using the Chinese version of Kiddie-Schedule for Affective Disorders and Schizophrenia-Present and Lifetime version (K-SADS-PL-C) [1], a semi-structured interview with parents based on the Diagnostic and Statistical Manual of Mental Disorders Fifth Edition (DSM-5). All children with ADHD and 11 HC were assessed with the K-SADS-PL-C, and others were interviewed with the Chinese version of Mini International Neuropsychiatric Interview for Children and Adolescents (MINI-KID) [2]. In the ADHD group: One participant did not meet the ADHD diagnosis criteria. Six participants had comorbid Oppositional Defiant Disorder (ODD), two had comorbid Tic Disorder, one had comorbid Major Depressive Disorder, two had comorbid Enuresis, one had comorbid Encopresis, and one had comorbid ODD and Autism Spectrum Disorder. For six participants, the difficulty of the contour integration task decreased from difficult to simple. In the HC group: Two participants met the ADHD diagnosis criteria, one did not complete the clinical interview, and one did not complete the Intelligence Test.

All participants met the following inclusion criteria: (a) no history of neurological illness or other severe diseases, (b) no current diagnosis of schizophrenia, mood disorders, autism, or other common psychiatry disorders and (c) a Full Scale Intelligence Quotient (FSIQ) at least 80 as measured by the Chinese Version of Wechsler Intelligence Scale for Children-Fourth Edition (WISC-IV), and (d) never received ADHD-related medication or other psychiatric treatments, or had discontinued such treatments for at least 15 days, and (e) had normal or corrected-to-normal vision. In addition, HC did not meet the ADHD diagnosis according to K-SADS-PL-C or MINI-KID. After applying the inclusion and exclusion criteria, there were 60 participants with ADHD and 39 participants in the HC group left.

To create an age- and gender-balanced sample between the ADHD and HC groups, we used the R software package *MatchIt* [3] (R version 4.4.0, package version 4.5.5) for subset selection. This package implements various matching methods to improve parametric statistical models. The parameter information we used during the matching process is as follows. The match was based on age and gender, with a ratio of 1:1 between children with ADHD and those in the HC group. After the propensity score matching was conducted, this study ultimately included 36 children diagnosed with ADHD and 36 age- and gender-matched HC, all aged between 6 and 13 years. (parameter information: method = nearest, distance = glm, link = linear.logit, ratio = 1, caliper = 0.3, std.caliper = T)

**Appendix S1b. Clinical Symptoms and Cognitive Function Assessment**

**ADHD Rating Scale**

The severity of inattentive, hyperactive/impulsive, and overall ADHD symptoms in all participants was assessed using the ADHD Rating Scale IV (ADHD-RS-IV) [4]. The scale comprises 18 items, each evaluated on a Likert scale ranging from 0 (none) to 3 (always), with elevated scores signifying more severe ADHD symptoms. The initial nine items pertain to attention deficit symptoms, and their scores are aggregated to derive the Inattention (IA) score. The subsequent nine items pertain to symptoms of hyperactivity and impulsivity, with their scores combined to yield the Hyperactivity-Impulsivity (HI) score. The IA and HI scores are then summed to calculate the Total (TO) score.

**Behavior Rating Inventory of Executive Function**

The Behavior Rating Inventory of Executive Function (BRIEF), developed by Gioia GA et al. [5], is a behavioral rating scale designed to assess executive function. It is structured into two primary components: the Behavior Regulation Index (BRI) and the Metacognition Index (MI). The BRI encompasses three factors: Inhibit, Shift, and Emotional Control, whereas the MI comprises five factors: Initiate, Working Memory, Plan, Organization, and Monitor. The summation of these composite scores yields a Global Executive Composite score. This instrument demonstrates strong ecological validity and can provide a comprehensive and effective evaluation of an individual's executive function in everyday life. The scale consists of 86 items, each rated on a three-point scale ranging from 1 (never) to 3 (often), with higher scores indicating greater impairment in executive function.

**Appendix S1c. Experimental Paradigm**

The experiment stimuli consisted of a closed Gabor-patch chain, which formed an egg-like oval against a randomly oriented Gabor-stimulus background. The contour integration task included three blocks of different orientation levels (30°/60°/90° jitter) with 60 trials per block. Blocks were presented in increasing order of difficulty: 30° (simple), 60° (moderate), 90° (difficult). The direction of the egg-shaped chain was leftward or rightward and the probability of each was 50%. Each stimulus was presented for 400 ms. Afterward, a red '+' fixation was shown (3000 ms) in the center of the screen to prompt the participant to respond. The participants were instructed to press the F or J keys on the keyboard when they saw that only the red '+' remained if the oval contour pointed to the left or right, respectively. Before the experiment, participants were introduced to the task through verbal description and practice to facilitate understanding of the procedure.

**Appendix S1d. EEG Recording and Preprocessing**

Data were preprocessed and analyzed offline using EEGLAB and customized MATLAB scripts (MathWorks, Inc., Natick, MA, USA). Thirty-eight peripheral electrodes were excluded from the following analysis due to susceptibility to movement interference. EEG data were down-sampled to 500 Hz and re-referenced to the average. Then, the data were filtered between 1 and 40 Hz with a second order Butterworth filter. Continuous data containing artifacts over all channels were discarded. Ocular blink artifacts were further removed from the remaining data by independent component analysis.

EEG data were segmented into epochs of -200 ms to 500 ms time locked to visual stimulus onsets and baseline corrected using the 200 ms pre-stimulus period. Epochs with voltages exceeding ±100 μV were rejected, and trials were calculated separately for 30°, 60° and 90° stimuli. Based on grand average waves, individual mean amplitudes for P1, N1, and Ncl were measured at left [E65 (PO7), E66, and E70 (O1)] and right [E83 (O2), E84, and E90 (PO8)] parieto-occipital regions in the time windows of 108-168 ms, 184-244 ms, and 356-416 ms, respectively.

**Appendix S2: Results**

**Appendix S2a. ANOVA of ACC**

| Effect | df | *F* | *P* Value | *η 2* | Follow-Up Tests c |
| --- | --- | --- | --- | --- | --- |
| Group | 1, 70 | 1.491 | 0.226 | 0.021 |  |
| Condition | 2, 69 | 177.105 | < 0.001 | 0.717 | Simple > Moderate a, Simple > Difficult b, Moderate > Difficult b |
| Group × Condition | 2, 69 | 2.392 | 0.107 | 0.033 |  |

Note: ANOVA, Analysis of variance; ACC, Accuracy.

a *P* < 0.01.

b *P* < 0.001.

c All follow-up tests of statistically significant effects survived Bonferroni correction for multiple comparisons.

**Appendix S2b. ANOVA of RT**

| Effect | df | *F* | *P* Value | *η 2* | Follow-Up Tests c |
| --- | --- | --- | --- | --- | --- |
| Group | 1, 70 | 0.844 | 0.361 | 0.012 |  |
| Condition | 2, 69 | 59.505 | < 0.001 | 0.459 | Simple < Moderate a, Simple < Difficult b, Moderate < Difficult b |
| Group × Condition | 2, 69 | 1.274 | 0.278 | 0.018 |  |

Note: ANOVA, Analysis of variance; RT, Reaction time.

a *P* < 0.01.

b *P* < 0.001.

c All follow-up tests of statistically significant effects survived Bonferroni correction for multiple comparisons.

**Appendix S2c. ANOVA of RTSD**

| Effect | df | *F* | *P* Value | *η 2* | Follow-Up Tests c |
| --- | --- | --- | --- | --- | --- |
| Group | 1, 70 | 0.003 | 0.953 | < 0.001 |  |
| Condition | 2, 69 | 20.728 | < 0.001 | 0.228 | Simple < Difficult a, Moderate < Difficult a |
| Group × Condition | 2, 69 | 2.584 | 0.079 | 0.036 |  |
| Group effect in simple condition | 1, 70 | 1.026 | 0.315 | 0.014 |  |
| Group effect in moderate condition | 1, 70 | 0.225 | 0.637 | 0.003 |  |
| Group effect in difficult condition | 1, 70 | 1.433 | 0.235 | 0.020 |  |
| Condition effect in HC | 2, 69 | 15.562 | < 0.001 | 0.311 | Simple < Difficult a, Moderate < Difficult a |
| Condition effect in ADHD | 2, 69 | 3.579 | 0.033 | 0.094 | Simple < Difficult b |

Note: ANOVA, Analysis of variance; RTSD, Reaction time standard deviation.

a *P* < 0.001.

b *P* < 0.05.

c All follow-up tests of statistically significant effects survived Bonferroni correction for multiple comparisons.

**Appendix S2d. ANOVA of Mean N1 Amplitudes**

| Effect | df | *F* | *P* Value | *η 2* | Follow-Up Tests |
| --- | --- | --- | --- | --- | --- |
| Group | 1, 70 | 1.865 | 0.176 | 0.026 |  |
| Condition | 2, 69 | 1.095 | 0.333 | 0.015 |  |
| Hemisphere | 1, 70 | 0.147 | 0.703 | 0.002 |  |
| Group × Condition | 2, 69 | 0.503 | 0.588 | 0.007 |  |
| Group × Hemisphere | 1, 70 | 3.608 | 0.062 | 0.049 |  |
| Group effect in Left Hemisphere | 1, 70 | 0.475 | 0.493 | 0.007 |  |
| Group effect in Right Hemisphere | 1, 70 | 3.088 | 0.083 | 0.042 | HC > ADHD |
| Hemisphere effect in HC | 1, 70 | 2.605 | 0.111 | 0.036 |  |
| Hemisphere effect in ADHD | 1, 70 | 1.150 | 0.287 | 0.016 |  |
| Condition × Hemisphere | 2, 69 | 0.399 | 0.647 | 0.006 |  |
| Group × Condition × Hemisphere | 2, 69 | 0.269 | 0.746 | 0.004 |  |

Note: ANOVA, Analysis of variance; HC, Healthy control; ADHD, Attention Deficit Hyperactivity Disorder.

**Appendix S2e. The simple Correlation between significant mean amplitudes and clinical characteristics in the ADHD group**

|  | R_30_Ncl  r (*P*) | R_60_Ncl  r (*P*) | R_90_Ncl  r (*P*) |
| --- | --- | --- | --- |
| ADHD-RS-IV IA score | -0.408 (0.780) | -0.079 (0.648) | -0.341 (0.042) a |
| ADHD-RS-IV HI score | -0.023 (0.895) | 0.256 (0.132) | 0.200 (0.243) |
| ADHD-RS-IV TO score | -0.045 (0.796) | 0.172 (0.316) | -0.013 (0.938) |
| BRIEF total score | -0.107 (0.535) | 0.047 (0.786) | 0.040 (0.817) |

Note: ADHD, Attention Deficit Hyperactivity Disorder; R_30_Ncl, Mean Ncl amplitude in right hemisphere of simple conditions; R_60_Ncl, Mean Ncl amplitude in right hemisphere of moderate conditions; R_90_Ncl, Mean Ncl amplitude in right hemisphere of difficult conditions; IA, Inattention; HI, Hyperactivity-Impulsivity; TO, Total.

a *P* (uncorrected) < 0.05.

**Appendix S2f. The partial Correlation between significant mean amplitudes and clinical characteristics in the ADHD group**

|  | R_30_Ncl  r (*P*) | R_60_Ncl  r (*P*) | R_90_Ncl  r (*P*) |
| --- | --- | --- | --- |
| ADHD-RS-IV IA score | -0.114 (0.526) | -0.123 (0.497) | -0.369 (0.034) a |
| ADHD-RS-IV HI score | -0.051 (0.777) | 0.221 (0.216) | 0.139 (0.440) |
| ADHD-RS-IV TO score | -0.104 (0.565) | 0.110 (0.542) | -0.092 (0.612) |
| BRIEF total score | -0.155 (0.388) | -0.029 (0.871) | -0.065 (0.718) |

Note: ADHD, Attention Deficit Hyperactivity Disorder; R_30_Ncl, Mean Ncl amplitude in right hemisphere of simple conditions; R_60_Ncl, Mean Ncl amplitude in right hemisphere of moderate conditions; R_90_Ncl, Mean Ncl amplitude in right hemisphere of difficult conditions; IA, Inattention; HI, Hyperactivity-Impulsivity; TO, Total. Age, gender and handedness were controlled for partial correlation.

a *P* (uncorrected) < 0.05.

**Appendix S2g. The simple Correlation between significant mean amplitudes and clinical characteristics in the HC group**

|  | R_30_Ncl  r (*P*) | R_60_Ncl  r (*P*) | R_90_Ncl  r (*P*) |
| --- | --- | --- | --- |
| ADHD-RS-IV IA score | 0.039 (0.821) | -0.025 (0.887) | -0.103 (0.549) |
| ADHD-RS-IV HI score | 0.248 (0.145) | 0.288 (0.088) | 0.130 (0.448) |
| ADHD-RS-IV TO score | 0.177 (0.302) | 0.164 (0.339) | 0.020 (0.910) |
| BRIEF total score | 0.095 (0.597) | -0.033 (0.854) | -0.200 (0.265) |

Note: HC, healthy controls; R_30_Ncl, Mean Ncl amplitude in right hemisphere of simple conditions; R_60_Ncl, Mean Ncl amplitude in right hemisphere of moderate conditions; R_90_Ncl, Mean Ncl amplitude in right hemisphere of difficult conditions; IA, Inattention; HI, Hyperactivity-Impulsivity; TO, Total.

**Appendix S2h. The partial Correlation between significant mean amplitudes and clinical characteristics in the HC group**

|  | R_30_Ncl  r (*P*) | R_60_Ncl  r (*P*) | R_90_Ncl  r (*P*) |
| --- | --- | --- | --- |
| ADHD-RS-IV IA score | 0.011 (0.955) | -0.029 (0.881) | -0.137 (0.471) |
| ADHD-RS-IV HI score | 0.124 (0.512) | 0.183 (0.333) | -0.058 (0.763) |
| ADHD-RS-IV TO score | 0.082 (0.667) | 0.094 (0.623) | -0.118 (0.535) |
| BRIEF total score | 0.066 (0.730) | -0.026 (0.892) | -0.199 (0.292) |

Note: HC, healthy controls; R_30_Ncl, Mean Ncl amplitude in right hemisphere of simple conditions; R_60_Ncl, Mean Ncl amplitude in right hemisphere of moderate conditions; R_90_Ncl, Mean Ncl amplitude in right hemisphere of difficult conditions; IA, Inattention; HI, Hyperactivity-Impulsivity; TO, Total. Age, gender and handedness were controlled for partial correlation.


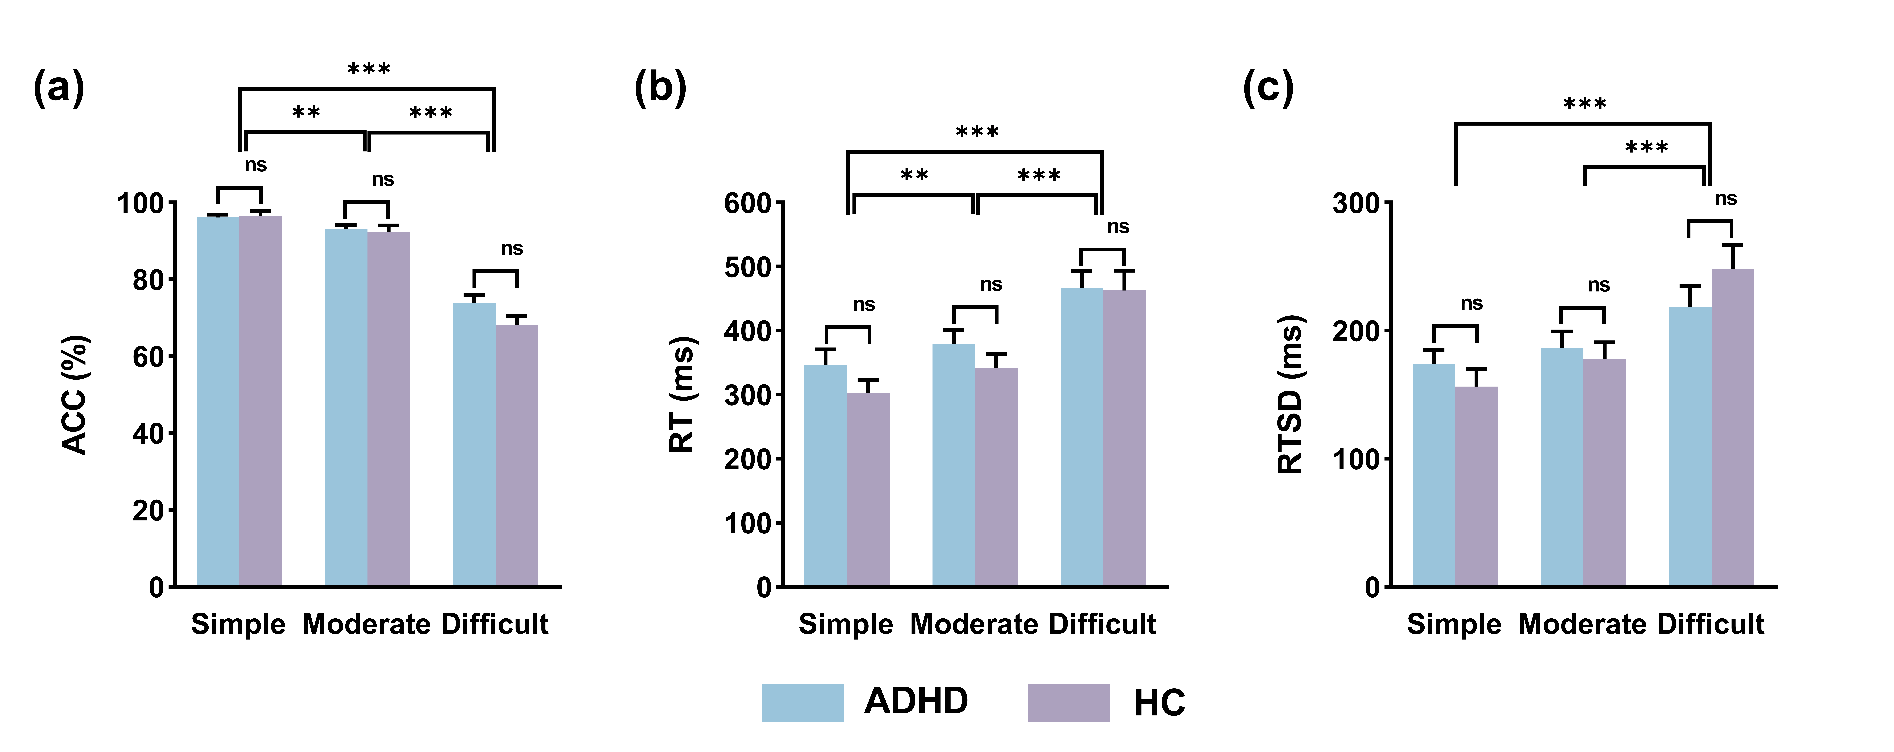


**Appendix S2i.** Behavioral performance of children with ADHD (blue bar) and HC (purple bar) in simple, moderate, and difficult conditions. ***P* < 0.01, ****P* < 0.001, ns = not significant.


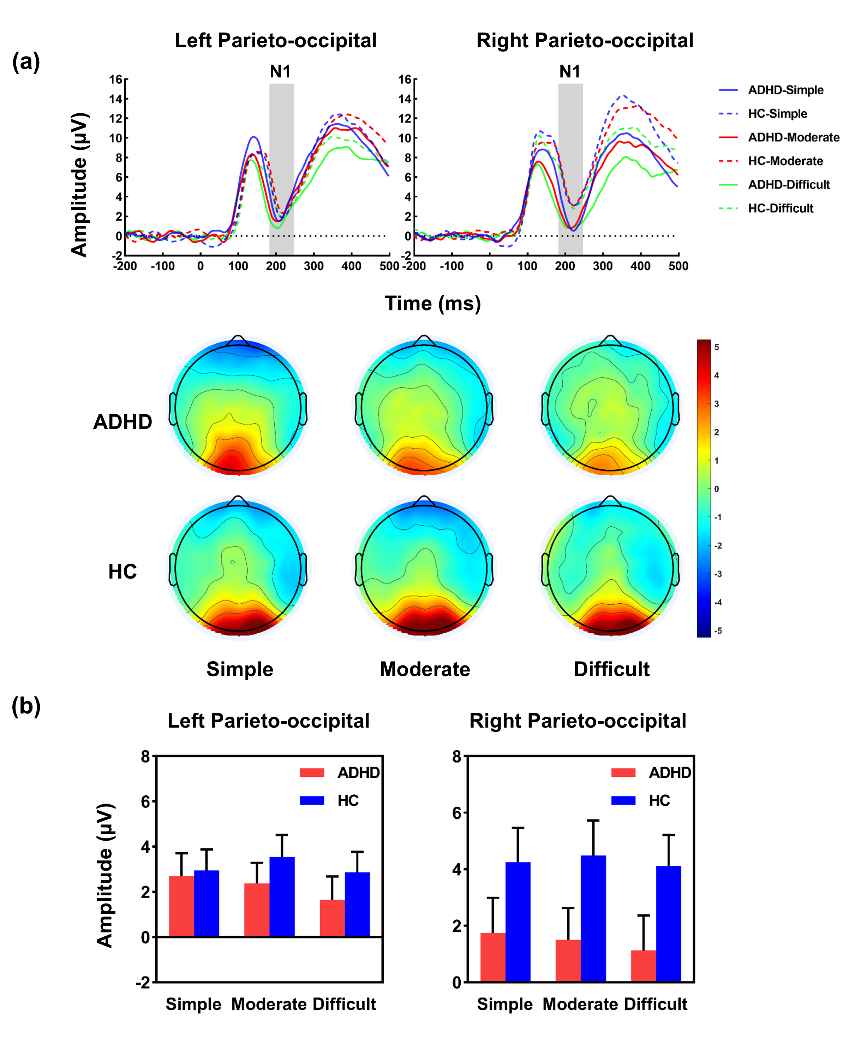


**Appendix S2j. N1 Amplitudes**. (a) N1 difference waveforms, averaged at left and right parieto-occipital regions, respectively, for children with ADHD and HC participants. The solid line represents ADHD, and the dashed line represents HC. Blue represents the simple condition, red represents the moderate condition, and green represents the difficult condition. Scalp voltage topography maps, showing group means of N1 amplitudes around the peak latency ±30 ms (indicated by gray bars in waveform plots), are shown for each condition. (b) The column graph shows means and standard errors of the mean for N1 amplitudes at left and right parieto-occipital regions. Red represents ADHD, and blue represents HC.

**References**

[1] Dun Y, Li QR, Yu H, Bai Y, Song Z, Lei C, et al. Reliability and validity of the Chinese version of the kiddie-schedule for affective disorders and schizophrenia-present and lifetime version DSM-5 (K-SADS-PL-C DSM-5). J Affect Disord. 2022;317:72-8.

[2] Liu YX LJ, Wang YF. Reliability and validity of Chinese version of the Mini International Neuropsychiatric Interview for Children and Adolescents (Parent Version). Chin Ment Health J. 2010;25:921–5.

[3] Ho D, Imai K, King G, Stuart EA. MatchIt: Nonparametric Preprocessing for Parametric Causal Inference. Journal of Statistical Software. 2011;42:1 - 28.

[4] Makransky G, Bilenberg N. Psychometric properties of the parent and teacher ADHD Rating Scale (ADHD-RS): measurement invariance across gender, age, and informant. Assessment. 2014;21:694-705.

[5] Gioia G, Isquith P, Guy SC, Kenworthy L. Behavior rating inventory of executive function. Child Neuropsychology. 2000;6:235-8.
